# Supplementary material
Source: PubMed Central journal article supplement (PMC5345582)

|     |                     | Antibody_Name | Gene_Name | SET2 Control 1_A | SET2 Control 2_A | SET2 Control 3_A | SET2 1.0 uM RUX 1 | SET2 1.0 uM RUX 2 | SET2 1.0 uM RUX 3 | log2_FC_SET2_RUX_1.0uM.over.SET2_Control_A | Pval_SET2_RUX_1.0uM.over.SET2_Control_A | adj.Pval_SET2_RUX_1.0uM.over.SET2_Control_A |
|-----|---------------------|---------------|-----------|------------------|------------------|------------------|-------------------|-------------------|-------------------|--------------------------------------------|-----------------------------------------|---------------------------------------------|
| 246 | S6_pS235_S236-R-V   | RPS6          |           | 1.693            | 1.735            | 1.739141         | -1.092489         | -1.124594         | -1.285829         | -2.89                                      | 1.2328E-06                              | 0.000182                                    |
| 265 | Stat3_pY705-R-V     | STAT3         |           | 0.737            | 0.579            | 0.544693         | -1.347099         | -1.282651         | -1.392517         | -1.96                                      | 0.000008276                             | 0.000479                                    |
| 247 | S6_pS240_S244-R-V   | RPS6          |           | 1.371            | 1.334            | 1.148171         | -0.61531          | -0.639449         | -0.738789         | -1.95                                      | 0.000015702                             | 0.000515                                    |
| 237 | Rb_pS807_S811-R-V   | RB1           |           | 0.886            | 0.898            | 0.853849         | -0.356435         | -0.424123         | -0.426109         | -1.28                                      | 1.0731E-06                              | 0.000182                                    |
| 17  | AMPKa_pT172-R-C     | PRKAA1        |           | 0.56             | 0.504            | 0.660164         | -0.7377           | -0.221188         | -0.491738         | -1.06                                      | 0.002466035                             | 0.014847                                    |
| 69  | Chk1-M-C            | CHEK1         |           | 0.617            | 0.582            | 0.653506         | -0.423607         | -0.084911         | -0.426122         | -0.93                                      | 0.001280879                             | 0.009686                                    |
| 70  | Chk1_pS296-R-V      | CHEK1         |           | 0.528            | 0.683            | 0.647924         | -0.316804         | -0.217018         | -0.379729         | -0.92                                      | 0.00015743                              | 0.002903                                    |
| 204 | Pdcd4-R-C           | PDCD4         |           | 0.252            | 0.085            | 0.141642         | -0.619032         | -0.723464         | -0.577006         | -0.8                                       | 0.000259428                             | 0.004252                                    |
| 10  | ACC_pS79-R-V        | ACACA         |           | 0.433            | 0.28             | 0.321697         | -0.515164         | -0.326906         | -0.471171         | -0.78                                      | 0.000427684                             | 0.004896                                    |
| 160 | MDM2_pS166-R-V      | MDM2          |           | 0.502            | 0.37             | 0.141844         | -0.460865         | -0.374622         | -0.305066         | -0.72                                      | 0.003293318                             | 0.017991                                    |
| 6   | 4E-BP1_pT37_T46-R-V | EIF4EBP1      |           | 0.518            | 0.472            | 0.435239         | -0.214097         | -0.207282         | -0.186917         | -0.68                                      | 0.000011361                             | 0.000479                                    |
| 253 | SLC1A5-R-C          | SLC1A5        |           | 0.318            | 0.346            | 0.227122         | -0.348874         | -0.325641         | -0.389133         | -0.65                                      | 8.62384E-05                             | 0.001957                                    |
| 117 | Gab2-R-V            | GAB2          |           | 0.549            | 0.505            | 0.586396         | -0.11149          | -0.124888         | 0.00617           | -0.62                                      | 0.000199629                             | 0.003464                                    |
| 134 | HES1-R-V            | HES1          |           | 0.563            | 0.712            | 0.679836         | 0.053745          | -0.002577         | 0.079042          | -0.61                                      | 0.000294158                             | 0.004339                                    |
| 8   | A-Raf-R-V           | ARAF          |           | 0.147            | 0.164            | 0.278493         | -0.384025         | -0.344776         | -0.436419         | -0.58                                      | 0.000285526                             | 0.004339                                    |
| 220 | PLK1-R-C            | PLK1          |           | 0.598            | 0.562            | 0.581246         | 0.050742          | 0.033816          | -0.012657         | -0.56                                      | 1.38502E-05                             | 0.000511                                    |
| 225 | PRAS40_pT246-R-V    | AKT1S1        |           | 0.535            | 0.534            | 0.631277         | 0.049547          | 0.029476          | -0.023824         | -0.55                                      | 0.000148644                             | 0.002903                                    |
| 183 | Notch1-R-V          | NOTCH1        |           | 0.448            | 0.486            | 0.504319         | -0.049642         | -0.089515         | -0.065937         | -0.55                                      | 1.12371E-05                             | 0.000479                                    |
| 5   | 4E-BP1_pS65-R-V     | EIF4EBP1      |           | 0.502            | 0.723            | 0.475895         | 0.097395          | -0.019173         | 0.035991          | -0.53                                      | 0.003462783                             | 0.018241                                    |

|            |                       |         |       |       |           |           |           |           |       |             |          |
|------------|-----------------------|---------|-------|-------|-----------|-----------|-----------|-----------|-------|-------------|----------|
| <b>195</b> | p70-S6K_pT389-R-V     | RPS6KB1 | 0.253 | 0.303 | 0.152772  | -0.333017 | -0.257198 | -0.22381  | -0.51 | 0.00075546  | 0.006555 |
| <b>9</b>   | ACC1-R-C              | ACACA   | 0.193 | 0.203 | 0.214392  | -0.26919  | -0.160596 | -0.430587 | -0.49 | 0.003369352 | 0.018072 |
| <b>270</b> | TAZ-R-V               | TAZ     | 0.431 | 0.51  | 0.476505  | -0.003272 | -0.021775 | -0.006673 | -0.48 | 3.33488E-05 | 0.00092  |
| <b>262</b> | Src_pY416-R-V         | SRC     | 0.067 | 0.273 | 0.394834  | -0.221797 | -0.184467 | -0.245504 | -0.46 | 0.008942911 | 0.032992 |
| <b>196</b> | p90RSK_pT573-R-C      | RPS6K   | 0.258 | 0.244 | 0.411503  | -0.115497 | -0.177268 | -0.154979 | -0.45 | 0.001314948 | 0.009686 |
| <b>180</b> | NDRG1_pT346-R-V       | NDRG1   | 0.197 | 0.385 | 0.33789   | -0.155022 | -0.004066 | -0.239339 | -0.44 | 0.007827166 | 0.03207  |
| <b>277</b> | Tuberin-R-V           | TSC2    | 0.23  | 0.244 | 0.289019  | -0.172039 | -0.11975  | -0.251417 | -0.44 | 0.00049787  | 0.004896 |
| <b>263</b> | Src_pY527-R-V         | SRC     | 0.394 | 0.354 | 0.412768  | 0         | -0.012907 | -0.119649 | -0.43 | 0.000494487 | 0.004896 |
| <b>110</b> | FASN-R-V              | FASN    | 0.138 | 0.181 | 0.265705  | -0.151369 | -0.139722 | -0.350523 | -0.41 | 0.006323559 | 0.028264 |
| <b>172</b> | mTOR-R-V              | MTOR    | 0.438 | 0.332 | 0.225204  | -0.054981 | -0.038676 | -0.13707  | -0.41 | 0.003961023 | 0.019805 |
| <b>83</b>  | Cyclin-B1-R-V         | CCNB1   | 0.351 | 0.37  | 0.435263  | -0.013702 | -0.10972  | 0.084664  | -0.4  | 0.002947899 | 0.017016 |
| <b>96</b>  | eEF2K-R-V             | EEF2K   | 0.497 | 0.405 | 0.294203  | 0.034355  | -0.063114 | 0.021876  | -0.4  | 0.00374472  | 0.019046 |
| <b>101</b> | eIF4G-R-C             | EIF4G1  | 0.481 | 0.425 | 0.384383  | 0.049528  | -0.002198 | 0.086173  | -0.39 | 0.000523665 | 0.004983 |
| <b>159</b> | MCT4-R-V              | SLC16A4 | 0.496 | 0.583 | 0.366213  | 0.129084  | 0.178096  | 0.00035   | -0.38 | 0.010006151 | 0.034727 |
| <b>112</b> | FoxM1-R-V             | FOXM1   | 0.206 | 0.226 | 0.294432  | -0.088782 | -0.257113 | -0.027398 | -0.37 | 0.007633277 | 0.031716 |
| <b>239</b> | Rictor-R-C            | RICTOR  | 0.15  | 0.071 | 0.291679  | -0.168149 | -0.241491 | -0.196814 | -0.37 | 0.00536663  | 0.024944 |
| <b>240</b> | Rictor_pT1135-R-V     | RICTOR  | 0.054 | 0.044 | -0.000899 | -0.305553 | -0.305654 | -0.275909 | -0.33 | 7.49422E-05 | 0.001842 |
| <b>32</b>  | b-Catenin-R-V         | CTNNB1  | 0.247 | 0.221 | 0.27729   | -0.054153 | 0.011544  | -0.198454 | -0.33 | 0.006840002 | 0.029674 |
| <b>200</b> | Paxillin-R-C          | PXN     | -0.27 | -0.22 | -0.342399 | 0.046136  | -0.007749 | 0.211228  | 0.36  | 0.008649872 | 0.032992 |
| <b>90</b>  | DM-K9-Histone-H3-R-C  | H3K9ME2 | -0.3  | -0.28 | -0.256816 | 0.121404  | -0.001207 | 0.129594  | 0.36  | 0.001217441 | 0.009451 |
| <b>89</b>  | DM-Histone-H3-R-V     | HISTH3  | -0.57 | -0.66 | -0.628491 | 0.188013  | -0.014057 | 0.178873  | 0.74  | 0.0004702   | 0.004896 |
| <b>58</b>  | Caspase-7-cleaved-R-C | CASP7   | -0.95 | -1.01 | -1.005989 | 0.145495  | 0.093279  | 0.209785  | 1.14  | 8.1299E-06  | 0.000479 |
| <b>57</b>  | Caspase-3-R-C         | CASP3   | -1.14 | -1.11 | -1.040525 | 0.125256  | 0.150231  | 0.236221  | 1.26  | 0.000008616 | 0.000479 |
| <b>198</b> | PAR-R-C               | PAR     | -1.31 | -1.42 | -1.456465 | 0.439231  | 0.221477  | 0.449212  | 1.76  | 3.43133E-05 | 0.00092  |
| <b>128</b> | H2AX_pS140-M-C        | H2AFX   | -1.25 | -1.25 | -1.418331 | 0.487633  | 0.288901  | 0.665417  | 1.79  | 0.000129966 | 0.002739 |
| <b>138</b> | Histone-H3-R-V        | HIST3H3 | -1.91 | -1.95 | -1.936881 | 0.916713  | 0.071834  | 0.514757  | 2.43  | 0.000571216 | 0.005266 |

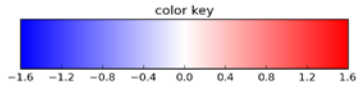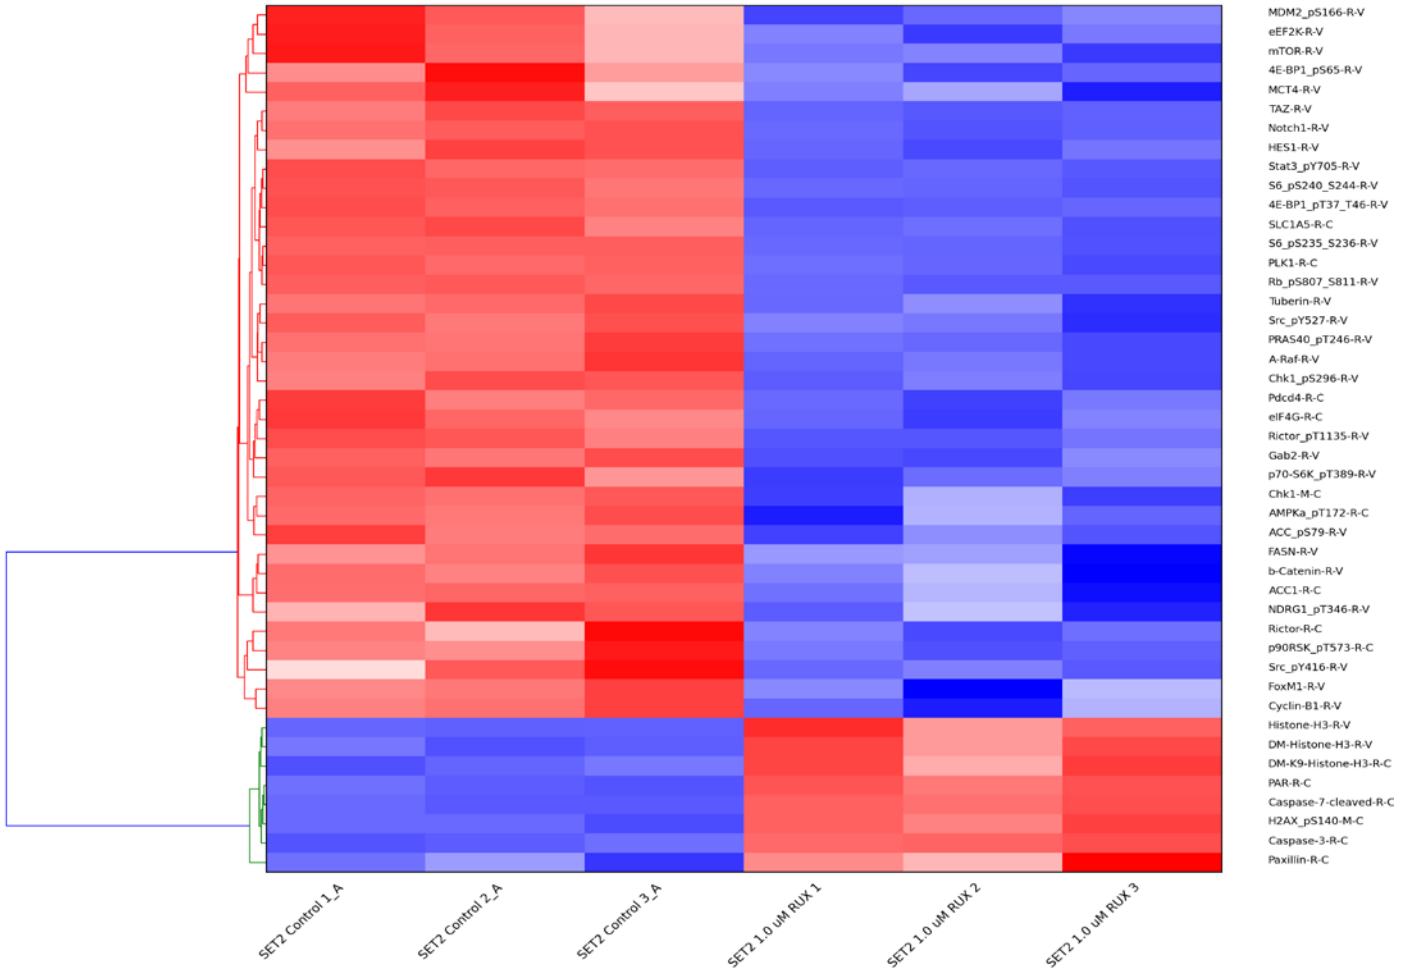

Supplement: NIHMS814116-supplement-4.pdf [file NIHMS814116-supplement-4.pdf]
