# Supplementary material
Source: PubMed Central journal article supplement (PMC5345582)

|     |                     | Antibody_Name | Gene_Name | SET2 Control 1_A | SET2 Control 2_A | SET2 Control 3_A | SET2 1.0 uM PAC1 | SET2 1.0 uM PAC2 | SET2 1.0 uM PAC3 | log2_FC_SET2_PAC_1.0uM.over.SET2_Control_A | Pval_SET2_PAC_1.0uM.over.SET2_Control_A | adj.Pval_SET2_PAC_1.0uM.over.SET2_Control_A |
|-----|---------------------|---------------|-----------|------------------|------------------|------------------|------------------|------------------|------------------|--------------------------------------------|-----------------------------------------|---------------------------------------------|
| 246 | S6_pS235_S236-R-V   | RPS6          |           | 1.693399         | 1.735116         | 1.739141         | -0.328672        | -0.328986        | -0.488286        | -2.1                                       | 2.8119E-06                              | 0.00083                                     |
| 247 | S6_pS240_S244-R-V   | RPS6          |           | 1.371032         | 1.333738         | 1.148171         | -0.335351        | -0.383295        | -0.513389        | -1.69                                      | 4.10254E-05                             | 0.00121                                     |
| 237 | Rb_pS807_S811-R-V   | RB1           |           | 0.885732         | 0.897627         | 0.853849         | -0.363262        | -0.397923        | -0.572875        | -1.32                                      | 3.68519E-05                             | 0.00121                                     |
| 69  | Chk1-M-C            | CHEK1         |           | 0.617481         | 0.582405         | 0.653506         | -0.642339        | -0.197905        | -0.207553        | -0.97                                      | 0.002833771                             | 0.022594                                    |
| 265 | Stat3_pY705-R-V     | STAT3         |           | 0.737126         | 0.578571         | 0.544693         | -0.003364        | -0.255817        | -0.31963         | -0.81                                      | 0.001998153                             | 0.017337                                    |
| 70  | Chk1_pS296-R-V      | CHEK1         |           | 0.527741         | 0.682773         | 0.647924         | -0.184987        | -0.118161        | -0.273327        | -0.81                                      | 0.000236532                             | 0.004652                                    |
| 220 | PLK1-R-C            | PLK1          |           | 0.59849          | 0.561582         | 0.581246         | -0.09059         | -0.160983        | -0.124312        | -0.71                                      | 6.6667E-06                              | 0.000851                                    |
| 225 | PRAS40_pT246-R-V    | AKT1S1        |           | 0.535244         | 0.533616         | 0.631277         | -0.122705        | -0.116498        | -0.067016        | -0.67                                      | 5.37991E-05                             | 0.001443                                    |
| 263 | Src_pY527-R-V       | SRC           |           | 0.393839         | 0.353869         | 0.412768         | -0.309804        | -0.213977        | -0.256687        | -0.65                                      | 3.85204E-05                             | 0.00121                                     |
| 134 | HES1-R-V            | HES1          |           | 0.562623         | 0.712494         | 0.679836         | 0.06716          | -0.012145        | 0                | -0.63                                      | 0.000256084                             | 0.004722                                    |
| 180 | NDRG1_pT346-R-V     | NDRG1         |           | 0.197048         | 0.384686         | 0.33789          | -0.538335        | -0.236836        | -0.103397        | -0.6                                       | 0.012976462                             | 0.065111                                    |
| 5   | 4E-BP1_pS65-R-V     | EIF4EBP1      |           | 0.501599         | 0.723274         | 0.475895         | -0.018613        | -0.021869        | -0.059078        | -0.6                                       | 0.001657413                             | 0.016298                                    |
| 159 | MCT4-R-V            | SLC16A4       |           | 0.49567          | 0.583358         | 0.366213         | -0.216231        | -0.047144        | -0.090196        | -0.6                                       | 0.001771685                             | 0.01686                                     |
| 117 | Gab2-R-V            | GAB2          |           | 0.548735         | 0.505033         | 0.586396         | 0.055312         | -0.029355        | -0.116497        | -0.58                                      | 0.00046333                              | 0.006509                                    |
| 270 | TAZ-R-V             | TAZ           |           | 0.43103          | 0.509875         | 0.476505         | -0.112659        | -0.067034        | -0.085138        | -0.56                                      | 2.91379E-05                             | 0.00121                                     |
| 183 | Notch1-R-V          | NOTCH1        |           | 0.447727         | 0.486294         | 0.504319         | -0.090378        | -0.03191         | -0.038876        | -0.53                                      | 2.80035E-05                             | 0.00121                                     |
| 6   | 4E-BP1_pT37_T46-R-V | EIF4EBP1      |           | 0.517666         | 0.472057         | 0.435239         | 0.065814         | -0.151714        | -0.058985        | -0.52                                      | 0.001481824                             | 0.015074                                    |
| 169 | Mnk1-R-V            | MKNK1         |           | 0.3392           | 0.384947         | 0.338267         | -0.075669        | -0.171225        | -0.215669        | -0.51                                      | 0.000322984                             | 0.005293                                    |
| 135 | Hexokinase-II-R-V   | HK2           |           | 0.310729         | 0.32279          | 0.126627         | -0.313405        | -0.170338        | -0.219122        | -0.49                                      | 0.003047096                             | 0.023655                                    |
| 101 | eIF4G-R-C           | EIF4G1        |           | 0.480558         | 0.425339         | 0.384383         | 0.010571         | -0.120005        | -0.056824        | -0.49                                      | 0.000490676                             | 0.00658                                     |

|     |                       |         |           |           |           |           |           |           |       |             |          |
|-----|-----------------------|---------|-----------|-----------|-----------|-----------|-----------|-----------|-------|-------------|----------|
| 269 | Tau-M-C               | MAPT    | 0.2796    | 0.318642  | 0.193813  | -0.003851 | -0.334846 | -0.291331 | -0.47 | 0.012627377 | 0.065111 |
| 17  | AMPKa_pT172-R-C       | PRKAA1  | 0.559711  | 0.50401   | 0.660164  | 0.306195  | -0.042587 | 0.048531  | -0.47 | 0.014517692 | 0.066917 |
| 96  | eEF2K-R-V             | EEF2K   | 0.497141  | 0.404664  | 0.294203  | 0.157894  | -0.139015 | -0.214812 | -0.46 | 0.022241525 | 0.086332 |
| 83  | Cyclin-B1-R-V         | CCNB1   | 0.35137   | 0.369781  | 0.435263  | 0.006612  | -0.077669 | -0.102381 | -0.44 | 0.000442223 | 0.006509 |
| 172 | mTOR-R-V              | MTOR    | 0.437714  | 0.332408  | 0.225204  | 0.041556  | -0.089542 | -0.089919 | -0.38 | 0.007423267 | 0.043917 |
| 14  | Akt_pS473-R-V         | AKT1    | 0.061835  | 0.14437   | 0.202568  | -0.479248 | -0.1537   | -0.091562 | -0.38 | 0.040925411 | 0.129732 |
| 68  | CDK1-R-C              | CDK1    | 0.380451  | 0.271873  | 0.346261  | -0.036051 | -0.07028  | 0.017467  | -0.36 | 0.000901828 | 0.010232 |
| 67  | cdc25C-R-V            | CDC25C  | 0.089958  | 0.131901  | 0.131726  | -0.389416 | -0.150254 | -0.112813 | -0.34 | 0.018753304 | 0.075802 |
| 31  | b-Actin-R-C           | ACTB    | -0.286887 | -0.181237 | -0.274044 | 0.247062  | 0.084773  | -0.070089 | 0.33  | 0.026417362 | 0.096211 |
| 267 | Stathmin-1-R-V        | STMN1   | -0.323277 | -0.303377 | -0.22821  | 0.064544  | 0.018276  | 0.070034  | 0.34  | 0.000542013 | 0.006952 |
| 271 | TFAM-R-V              | TFAM    | -0.183049 | -0.253581 | -0.296249 | 0.213143  | 0.041422  | 0.094537  | 0.36  | 0.003986838 | 0.029403 |
| 90  | DM-K9-Histone-H3-R-C  | H3K9ME2 | -0.304463 | -0.280256 | -0.256816 | 0.072779  | 0.09103   | 0.0725    | 0.36  | 1.83054E-05 | 0.00121  |
| 285 | Vimentin-M-C          | VIM     | -0.367749 | -0.324457 | -0.111267 | -0.020263 | 0.143434  | 0.31859   | 0.42  | 0.030035595 | 0.103029 |
| 167 | Mitochondria-M-V      | MTCO2   | -0.20695  | -0.175677 | -0.279172 | 0.260828  | 0.143891  | 0.260849  | 0.44  | 0.000872181 | 0.010232 |
| 259 | SOD2-R-V              | SOD2    | -0.3256   | -0.261328 | -0.376369 | 0.070549  | 0.12305   | 0.257305  | 0.47  | 0.001897903 | 0.017109 |
| 121 | Glutamate-D1-2-R-C    | GLUD    | -0.314747 | -0.326006 | -0.2374   | 0.057915  | 0.094068  | 0.38771   | 0.47  | 0.011941009 | 0.062904 |
| 89  | DM-Histone-H3-R-V     | HISTH3  | -0.573116 | -0.658081 | -0.628491 | 0.146448  | 0.098965  | 0.054772  | 0.72  | 3.83012E-05 | 0.00121  |
| 58  | Caspase-7-cleaved-R-C | CASP7   | -0.949093 | -1.008542 | -1.005989 | 0.391857  | 0.150256  | 0.034866  | 1.18  | 0.00038345  | 0.005954 |
| 57  | Caspase-3-R-C         | CASP3   | -1.135877 | -1.106666 | -1.040525 | 0.26889   | 0.155439  | 0.175181  | 1.29  | 8.6581E-06  | 0.000851 |
| 198 | PAR-R-C               | PAR     | -1.308089 | -1.418955 | -1.456465 | -0.181573 | 0.025307  | 0.122466  | 1.38  | 0.000159016 | 0.003608 |
| 128 | H2AX_pS140-M-C        | H2AFX   | -1.248121 | -1.24706  | -1.418331 | 0.260339  | 0.163972  | -0.000567 | 1.45  | 0.000109092 | 0.002682 |
| 138 | Histone-H3-R-V        | HIST3H3 | -1.909188 | -1.947751 | -1.936881 | 0.779821  | 0.027517  | 0.006617  | 2.2   | 0.000981753 | 0.010727 |

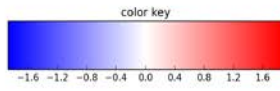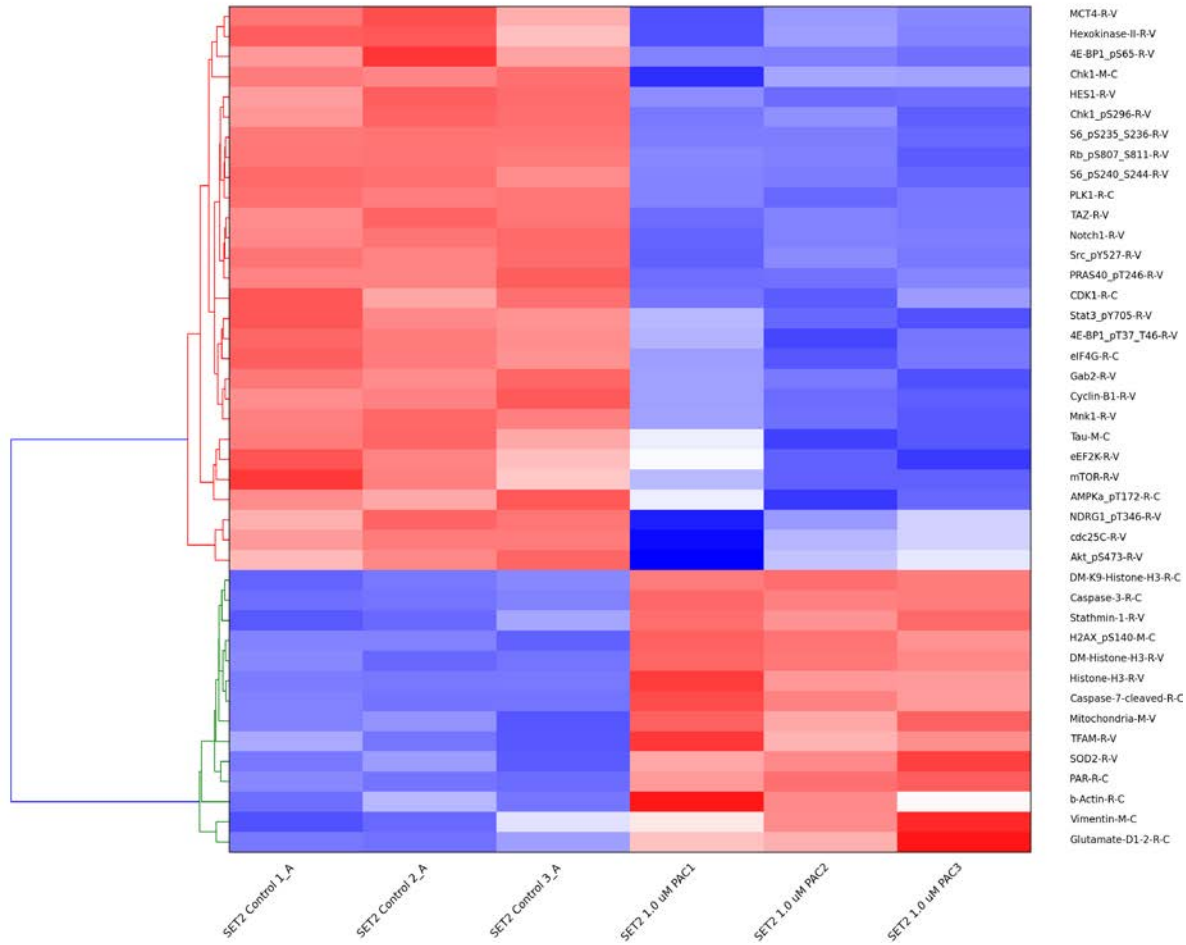

Supplement: NIHMS814116-supplement-5.pdf [file NIHMS814116-supplement-5.pdf]
