# Supplementary material
Source: PubMed Central journal article supplement (PMC5345582)
Supplement: NIHMS814116-supplement-3.pdf [file NIHMS814116-supplement-3.pdf]

|     | Antibody_Name         | Gene_Name | HEL Control 1_B | HEL Control 2_B | HEL Control 3_B | HEL 1.0 uM JQ1 1 | HEL 1.0 uM JQ1 2 | HEL 1.0uM JQ1 3 | log2_FC_HEL_JQ1_1.0uM.over.HEL_Control_B | Pval_HEL_JQ1_1.0uM.over.HEL_Control_B | adj.Pval_HEL_JQ1_1.0uM.over.HEL_Control_B |
|-----|-----------------------|-----------|-----------------|-----------------|-----------------|------------------|------------------|-----------------|------------------------------------------|---------------------------------------|-------------------------------------------|
| 22  | ARID1A-R-C            | ARID1A    | -0.015          | 0.046           | 0.07            | -2.519           | -2.634           | -2.62           | -2.63                                    | 4.997E-07                             | 4.77949E-05                               |
| 246 | S6_pS235_S236-R-V     | RPS6      | 1.478           | 1.467           | 1.5             | -0.96            | -1.149           | -1.16           | -2.57                                    | 2.5511E-06                            | 9.40718E-05                               |
| 237 | Rb_pS807_S811-R-V     | RB1       | 0.119           | 0.01            | 0.17            | -2.247           | -2.375           | -2.37           | -2.43                                    | 2.5001E-06                            | 9.40718E-05                               |
| 247 | S6_pS240_S244-R-V     | RPS6      | 1.27            | 0.908           | 0.94            | -1.09            | -1.126           | -1.18           | -2.17                                    | 5.27257E-05                           | 0.000486065                               |
| 70  | Chk1_pS296-R-V        | CHEK1     | 0.188           | -0.2            | -0.2            | -2.157           | -2.268           | -2.26           | -2.16                                    | 8.87233E-05                           | 0.000584089                               |
| 266 | Stat5a-R-V            | STAT5A    | -0.218          | -0.24           | 0.17            | -2.087           | -2.201           | -2.19           | -2.06                                    | 0.000113732                           | 0.000633037                               |
| 10  | ACC_pS79-R-V          | ACACA     | 0.301           | 0.142           | 0.12            | -1.713           | -1.755           | -1.73           | -1.92                                    | 4.9754E-06                            | 0.000106287                               |
| 69  | Chk1-M-C              | CHEK1     | 0.035           | 0.023           | 0.12            | -1.825           | -1.849           | -1.83           | -1.89                                    | 4.913E-07                             | 4.77949E-05                               |
| 239 | Rictor-R-C            | RICTOR    | -0.186          | -0.06           | 0.64            | -1.759           | -1.778           | -1.69           | -1.87                                    | 0.001957364                           | 0.005661005                               |
| 6   | 4E-BP1_pT37_T46-R-V   | EIF4EBP1  | 0.508           | 0.474           | 0.56            | -1.242           | -1.356           | -1.39           | -1.84                                    | 3.7235E-06                            | 9.90684E-05                               |
| 101 | eIF4G-R-C             | EIF4G1    | 0.186           | 0.133           | 0.17            | -1.572           | -1.67            | -1.6            | -1.78                                    | 7.404E-07                             | 4.77949E-05                               |
| 117 | Gab2-R-V              | GAB2      | 0.21            | 0.159           | -0              | -1.54            | -1.516           | -1.42           | -1.61                                    | 3.28852E-05                           | 0.000373121                               |
| 204 | Pdcd4-R-C             | PDCD4     | 0.067           | 0.127           | 0.12            | -1.298           | -1.448           | -1.46           | -1.51                                    | 1.03904E-05                           | 0.000180304                               |
| 172 | mTOR-R-V              | MTOR      | 0.11            | -0.11           | 0.1             | -1.388           | -1.5             | -1.46           | -1.49                                    | 4.71154E-05                           | 0.000448356                               |
| 198 | PAR-R-C               | PAR       | -0.18           | -0.29           | 0.05            | -1.656           | -1.724           | -1.52           | -1.49                                    | 0.000210308                           | 0.001017063                               |
| 160 | MDM2_pS166-R-V        | MDM2      | 0.297           | -0.24           | -0.3            | -1.578           | -1.563           | -1.53           | -1.47                                    | 0.001554174                           | 0.00482612                                |
| 9   | ACC1-R-C              | ACACA     | 0.179           | 0.32            | 0.3             | -1.082           | -1.178           | -1.17           | -1.41                                    | 1.19618E-05                           | 0.000196041                               |
| 175 | Myosin-Ila_pS1943-R-V | MYO2A     | 0.181           | -0.15           | -0.2            | -1.535           | -1.539           | -1.3            | -1.41                                    | 0.000503124                           | 0.002032213                               |
| 173 | mTOR_pS2448-R-C       | MTOR      | 0.556           | -0.2            | 0.06            | -1.237           | -1.267           | -1.2            | -1.37                                    | 0.003553131                           | 0.008827837                               |

|     |                      |           |        |       |      |        |        |       |       |             |             |
|-----|----------------------|-----------|--------|-------|------|--------|--------|-------|-------|-------------|-------------|
| 243 | RPA32_pS4_S8-R-C     | RPA32     | 0.227  | -0.06 | 0.2  | -1.18  | -1.228 | -1.12 | -1.3  | 0.00017627  | 0.000881348 |
| 17  | AMPKa_pT172-R-C      | PRKAA1    | 0.095  | -0.04 | 0.13 | -1.188 | -1.212 | -1.31 | -1.3  | 3.20511E-05 | 0.000373121 |
| 264 | Stat3-R-C            | STAT3     | 0.261  | 0.185 | 0.22 | -1.055 | -1.048 | -1.09 | -1.29 | 0.00000086  | 4.77949E-05 |
| 7   | 53BP1-R-V            | TP53BP1   | 0.334  | 0.23  | 0.09 | -1.061 | -1.104 | -1.01 | -1.28 | 7.58499E-05 | 0.000571676 |
| 112 | FoxM1-R-V            | FOXM1     | 0.044  | 0.137 | 0.12 | -1.157 | -1.168 | -1.09 | -1.24 | 5.4044E-06  | 0.000106287 |
| 127 | Gys_pS641-R-V        | GYS1      | 0.335  | 0.102 | -0   | -1.524 | -0.925 | -0.86 | -1.24 | 0.006260219 | 0.012563024 |
| 96  | eEF2K-R-V            | EEF2K     | 0.322  | 0.073 | -0.1 | -1.02  | -1.097 | -1.09 | -1.18 | 0.000509775 | 0.002032213 |
| 225 | PRAS40_pT246-R-V     | AKT1S1    | 0.244  | 0.37  | 0.3  | -0.847 | -0.832 | -0.88 | -1.16 | 7.4678E-06  | 0.000137688 |
| 220 | PLK1-R-C             | PLK1      | 0.285  | 0.354 | 0.26 | -0.836 | -0.829 | -0.88 | -1.15 | 0.000003144 | 9.90684E-05 |
| 265 | Stat3_pY705-R-V      | STAT3     | 0.247  | 0.324 | 0.21 | -0.812 | -0.904 | -0.92 | -1.14 | 1.79893E-05 | 0.000279308 |
| 106 | ERCC5-R-C            | ERCC5     | 0.099  | 0.011 | -0.1 | -1.083 | -1.164 | -1.12 | -1.13 | 0.000039381 | 0.000410727 |
| 125 | GSK-3a-b_pS21_S9-R-V | GSK3A,GSK | 0.319  | 0.087 | 0.12 | -0.931 | -0.961 | -0.91 | -1.11 | 0.000112739 | 0.000633037 |
| 35  | B-Raf_pS445-R-V      | BRAF      | 0.16   | 0.15  | 0.05 | -1.031 | -1.016 | -0.92 | -1.11 | 2.26647E-05 | 0.000313598 |
| 169 | Mnk1-R-V             | MKNK1     | -0.001 | -0.16 | -0.2 | -1.21  | -1.286 | -1.17 | -1.1  | 0.000110047 | 0.000633037 |
| 221 | PMS2-R-V             | PMS2      | 0.283  | 0.116 | -0.1 | -0.981 | -1.009 | -0.94 | -1.09 | 0.000476309 | 0.001968357 |
| 51  | c-Kit-R-V            | KIT       | 0.397  | 0.12  | -0   | -0.818 | -0.976 | -0.96 | -1.08 | 0.00139089  | 0.004610253 |
| 134 | HES1-R-V             | HES1      | 0.376  | 0.301 | 0.15 | -0.837 | -0.775 | -0.79 | -1.08 | 0.000094877 | 0.000595505 |
| 190 | p38-MAPK-R-V         | MAPK14    | -0.061 | -0.08 | 0.12 | -1.097 | -1.082 | -1.06 | -1.07 | 7.75154E-05 | 0.000571676 |
| 92  | Dvl3-R-V             | DVL3      | 0.223  | 0.157 | 0.02 | -0.918 | -0.876 | -0.85 | -1.02 | 8.32542E-05 | 0.000584089 |
| 151 | Jak2-R-V             | JAK2      | -0.102 | -0.11 | -0   | -1.112 | -1.128 | -1.05 | -1.01 | 5.0727E-06  | 0.000106287 |
| 194 | p70-S6K1-R-V         | RPS6KB1   | 0.279  | 0.049 | -0.2 | -0.897 | -1.042 | -0.88 | -0.99 | 0.002280728 | 0.006469372 |
| 54  | c-Myc-R-C            | MYC       | 0.177  | 0.226 | 0.2  | -0.744 | -0.803 | -0.72 | -0.96 | 4.0299E-06  | 9.90684E-05 |
| 277 | Tuberin-R-V          | TSC2      | 0.165  | 0.188 | 0.02 | -0.783 | -0.816 | -0.84 | -0.94 | 6.76435E-05 | 0.000566678 |
| 180 | NDRG1_pT346-R-V      | NDRG1     | 0.177  | 0.292 | 0.11 | -0.759 | -0.74  | -0.71 | -0.93 | 7.05872E-05 | 0.000566678 |
| 263 | Src_pY527-R-V        | SRC       | 0.097  | 0.199 | 0.03 | -0.819 | -0.823 | -0.74 | -0.9  | 8.60945E-05 | 0.000584089 |
| 227 | PTEN-R-V             | PTEN      | 0.323  | 0.089 | -0.1 | -0.747 | -0.845 | -0.74 | -0.89 | 0.001699754 | 0.005116608 |
| 40  | BAP1-M-V             | BAP1      | 0.11   | 0.124 | -0.1 | -0.828 | -0.881 | -0.84 | -0.88 | 0.000599022 | 0.002356154 |
| 191 | p38_pT180_Y182-R-V   | MAPK14    | -0.027 | -0.06 | -0.2 | -0.946 | -0.993 | -0.92 | -0.86 | 0.000106921 | 0.000633037 |
| 145 | IGFRb-R-C            | IGF1R     | 0.062  | -0.09 | -0.2 | -0.884 | -0.985 | -0.89 | -0.85 | 0.000361454 | 0.001591476 |
| 171 | MSH6-R-C             | MSH6      | 0.135  | 0.088 | 0.05 | -0.713 | -0.802 | -0.73 | -0.84 | 0.000023387 | 0.000313598 |
| 268 | Syk-M-V              | SYK       | -0.161 | -0.16 | -0.1 | -0.862 | -0.969 | -1.02 | -0.8  | 7.29958E-05 | 0.000566678 |
| 234 | Raptor-R-V           | RPTOR     | -0.162 | -0.09 | 0.45 | -0.722 | -0.735 | -0.7  | -0.79 | 0.015261724 | 0.026483579 |
| 295 | YB1_pS102-R-V        | YBX1      | 0.569  | 0.489 | 0.37 | -0.32  | -0.303 | -0.32 | -0.79 | 0.000163227 | 0.000844771 |
| 108 | FAK-R-C              | PTK2      | 0.393  | 0.163 | -0   | -0.669 | -0.618 | -0.55 | -0.79 | 0.003702034 | 0.008827837 |

|            |                       |          |        |       |      |        |        |       |       |             |             |
|------------|-----------------------|----------|--------|-------|------|--------|--------|-------|-------|-------------|-------------|
| <b>38</b>  | Bad_pS112-R-V         | BAD      | 0.232  | 0.133 | -0.1 | -0.703 | -0.694 | -0.64 | -0.78 | 0.001057239 | 0.003669243 |
| <b>4</b>   | 4E-BP1-R-V            | EIF4EBP1 | -0.052 | 0.027 | -0   | -0.727 | -0.856 | -0.83 | -0.78 | 7.25324E-05 | 0.000566678 |
| <b>5</b>   | 4E-BP1_pS65-R-V       | EIF4EBP1 | 0.412  | 0.36  | 0.12 | -0.403 | -0.436 | -0.48 | -0.74 | 0.00132062  | 0.004427078 |
| <b>288</b> | XIAP-R-C              | XIAP     | 0.239  | 0.23  | 0    | -0.588 | -0.61  | -0.56 | -0.74 | 0.000691606 | 0.00264966  |
| <b>126</b> | Gys-R-V               | GYS1     | -0.043 | 0.019 | -0.1 | -0.759 | -0.802 | -0.82 | -0.74 | 8.90983E-05 | 0.000584089 |
| <b>152</b> | JNK2-R-C              | MAPK9    | 0.219  | -0.11 | -0.1 | -0.768 | -0.74  | -0.68 | -0.72 | 0.003391753 | 0.008625579 |
| <b>262</b> | Src_pY416-R-V         | SRC      | -0.485 | -0.09 | 0.02 | -0.862 | -0.946 | -0.89 | -0.72 | 0.010149763 | 0.018713626 |
| <b>244</b> | RSK-R-C               | RPS6KA1  | 0.319  | -0.07 | 0    | -0.689 | -0.642 | -0.55 | -0.71 | 0.00490421  | 0.010960166 |
| <b>189</b> | p27_pT198-R-V         | CDKN1B   | 0.262  | 0.278 | 0.16 | -0.424 | -0.471 | -0.43 | -0.68 | 5.97793E-05 | 0.000534391 |
| <b>161</b> | MEK1-R-V              | MAP2K1   | 0.149  | -0.07 | -0.2 | -0.709 | -0.781 | -0.67 | -0.67 | 0.003729937 | 0.008827837 |
| <b>207</b> | PDK1_pS241-R-V        | PDK1     | 0.05   | 0.081 | -0.1 | -0.635 | -0.711 | -0.64 | -0.66 | 0.000890933 | 0.003166569 |
| <b>216</b> | PKC-b-II_pS660-R-V    | PRKCB    | -0.078 | -0.16 | 0.18 | -0.634 | -0.694 | -0.66 | -0.65 | 0.003517437 | 0.008827837 |
| <b>289</b> | XPA-M-V               | XPA      | 0.2    | 0.102 | -0.1 | -0.57  | -0.509 | -0.57 | -0.63 | 0.001438545 | 0.004663414 |
| <b>115</b> | FRA-1-R-C             | FOSL1    | 0.192  | -0.24 | -0.4 | -0.76  | -0.747 | -0.75 | -0.62 | 0.021355861 | 0.034615269 |
| <b>283</b> | VEGFR-2-R-V           | KDR      | 0.169  | 0.103 | 0.12 | -0.393 | -0.474 | -0.49 | -0.58 | 8.66066E-05 | 0.000584089 |
| <b>83</b>  | Cyclin-B1-R-V         | CCNB1    | 0.058  | 0.151 | 0.21 | -0.379 | -0.413 | -0.42 | -0.54 | 0.000273794 | 0.001242601 |
| <b>196</b> | p90RSK_pT573-R-C      | RPS6K    | 0.363  | 0.453 | 0.26 | -0.198 | -0.144 | -0.15 | -0.52 | 0.000820588 | 0.002988562 |
| <b>114</b> | FoxO3a_pS318_S321-R-C | FOXO3    | 0.204  | 0.033 | -0.1 | -0.504 | -0.455 | -0.42 | -0.51 | 0.003672454 | 0.008827837 |
| <b>183</b> | Notch1-R-V            | NOTCH1   | 0.119  | 0.151 | -0.1 | -0.463 | -0.457 | -0.4  | -0.51 | 0.001520718 | 0.004772467 |
| <b>32</b>  | b-Catenin-R-V         | CTNNB1   | -0.088 | -0.03 | 0.16 | -0.449 | -0.42  | -0.61 | -0.51 | 0.005882707 | 0.012135655 |
| <b>71</b>  | Chk1_pS345-R-C        | CHEK1    | 0.236  | 0.015 | -0.1 | -0.463 | -0.486 | -0.4  | -0.51 | 0.005282953 | 0.01154423  |
| <b>72</b>  | Chk2-M-V              | CHEK2    | 0.225  | 0.088 | -0   | -0.376 | -0.416 | -0.4  | -0.49 | 0.003102524 | 0.008274166 |
| <b>25</b>  | ATM-R-V               | ATM      | -0.193 | -0.11 | -0.3 | -0.705 | -0.651 | -0.71 | -0.48 | 0.001287689 | 0.004366302 |
| <b>8</b>   | A-Raf-R-V             | ARAF     | 0.179  | 0.204 | 0.09 | -0.368 | -0.294 | -0.3  | -0.48 | 0.000358031 | 0.001591476 |
| <b>13</b>  | Akt-R-V               | AKT1     | -0.134 | 0.036 | 0.12 | -0.432 | -0.497 | -0.45 | -0.47 | 0.003758243 | 0.008827837 |
| <b>280</b> | UBAC1-R-V             | UBAC1    | 0.41   | 0.007 | -0   | -0.314 | -0.327 | -0.33 | -0.45 | 0.032002503 | 0.049427949 |
| <b>226</b> | PREX1-R-V             | PREX1    | -0.196 | -0.13 | -0.2 | -0.613 | -0.635 | -0.63 | -0.45 | 3.17195E-05 | 0.000373121 |
| <b>56</b>  | C-Raf_pS338-R-V       | RAF1     | 0.114  | 0.174 | 0.13 | -0.276 | -0.265 | -0.32 | -0.43 | 6.93296E-05 | 0.000566678 |
| <b>16</b>  | AMPKa-R-C             | PRKAA1   | 0.078  | -0.06 | -0.1 | -0.414 | -0.482 | -0.49 | -0.43 | 0.002636382 | 0.00726853  |
| <b>136</b> | HIAP-R-C              | BIRC2    | 0.009  | -0.04 | -0.1 | -0.457 | -0.477 | -0.39 | -0.41 | 0.000245172 | 0.001148027 |
| <b>120</b> | GCN5L2-R-V            | KAT2A    | 0.203  | 0.006 | -0.1 | -0.384 | -0.393 | -0.39 | -0.41 | 0.01414281  | 0.024982808 |
| <b>28</b>  | ATR_pS428-R-C         | ATR      | 0.15   | 0.115 | -0   | -0.396 | -0.336 | -0.28 | -0.41 | 0.004278988 | 0.009861731 |
| <b>68</b>  | CDK1-R-C              | CDK1     | 0.002  | -0.01 | 0.12 | -0.399 | -0.377 | -0.34 | -0.41 | 0.000819544 | 0.002988562 |
| <b>252</b> | SHP-2_pY542-R-C       | PTPN11   | 0.128  | 0.265 | 0.32 | -0.179 | -0.145 | -0.11 | -0.38 | 0.00311333  | 0.008274166 |

|            |                      |          |        |       |      |        |        |       |       |             |             |
|------------|----------------------|----------|--------|-------|------|--------|--------|-------|-------|-------------|-------------|
| <b>240</b> | Rictor_pT1135-R-V    | RICTOR   | -0.052 | 0.087 | 0.15 | -0.284 | -0.347 | -0.3  | -0.37 | 0.003960454 | 0.009199479 |
| <b>78</b>  | Connexin-43-R-C      | CNST43   | 0.343  | 0.537 | 0.44 | 0.0632 | 0.0528 | 0.094 | -0.37 | 0.002921903 | 0.007922032 |
| <b>235</b> | Rb-M-Q               | RB1      | 0.257  | 0.137 | -0   | -0.215 | -0.239 | -0.24 | -0.36 | 0.009430551 | 0.017948468 |
| <b>55</b>  | C-Raf-R-C            | RAF1     | 0.14   | 0.093 | 0.12 | -0.243 | -0.199 | -0.27 | -0.35 | 0.000129189 | 0.000692921 |
| <b>205</b> | PDGFR-b-R-V          | PDGFR    | 0.052  | 0.255 | 0.26 | -0.206 | -0.145 | -0.14 | -0.35 | 0.007958889 | 0.01558963  |
| <b>61</b>  | CD171-M-V            | L1CAM    | -0.195 | 0.077 | 0.04 | 0.3108 | 0.2947 | 0.31  | 0.33  | 0.017185183 | 0.02880471  |
| <b>144</b> | IGFBP5-G-C           | IGFBP5   | -0.222 | 0.026 | 0.12 | 0.2675 | 0.2958 | 0.365 | 0.33  | 0.034899836 | 0.053069338 |
| <b>197</b> | PAI-1-M-V            | SERPINE1 | -0.115 | 0.024 | -0.1 | 0.3194 | 0.2368 | 0.242 | 0.34  | 0.003677677 | 0.008827837 |
| <b>104</b> | ER-R-V               | ESR1     | -0.282 | -0.04 | 0.12 | 0.2536 | 0.2777 | 0.28  | 0.34  | 0.045466896 | 0.067400675 |
| <b>43</b>  | Bcl2-M-V             | BCL2     | -0.212 | -0.07 | 0.08 | 0.3091 | 0.2592 | 0.246 | 0.34  | 0.016601411 | 0.02814607  |
| <b>165</b> | MIF-R-C              | MIF      | -0.025 | 0.003 | 0.09 | 0.3739 | 0.3729 | 0.338 | 0.34  | 0.000761741 | 0.002844477 |
| <b>176</b> | Myt1-R-C             | MYT1     | -0.232 | -0.08 | 0.05 | 0.2266 | 0.2643 | 0.316 | 0.35  | 0.014962549 | 0.026273524 |
| <b>181</b> | NDUFB4-M-V           | NDUFB4   | -0.221 | -0.02 | 0.06 | 0.295  | 0.281  | 0.308 | 0.36  | 0.012211816 | 0.021966376 |
| <b>24</b>  | Atg7-R-V             | ATG7     | -0.033 | 0.003 | -0   | 0.3342 | 0.3343 | 0.377 | 0.36  | 3.41621E-05 | 0.000373253 |
| <b>109</b> | FAK_pY397-R-V        | PTK2     | -0.321 | -0.07 | 0.05 | 0.271  | 0.2975 | 0.235 | 0.38  | 0.024535582 | 0.03891396  |
| <b>65</b>  | CD44-M-C             | CD44     | -0.202 | -0.03 | 0.05 | 0.2616 | 0.346  | 0.343 | 0.38  | 0.009371683 | 0.017948468 |
| <b>209</b> | PEA-15_pS116-R-V     | PEA15    | -0.199 | -0.06 | 0.04 | 0.32   | 0.2968 | 0.321 | 0.38  | 0.005553443 | 0.011728598 |
| <b>11</b>  | ACVRL1-R-C           | ACVRL1   | -0.263 | -0    | 0.06 | 0.3194 | 0.3093 | 0.345 | 0.39  | 0.016407109 | 0.02797744  |
| <b>192</b> | p44-42-MAPK-R-V      | MAPK3    | 0.052  | -0.02 | -0.1 | 0.3837 | 0.3629 | 0.334 | 0.39  | 0.001739234 | 0.005154727 |
| <b>203</b> | Pdcd-1L1-G-C         | PDCD1    | -0.229 | -0.12 | -0.1 | 0.1093 | 0.1788 | 0.442 | 0.4   | 0.020447339 | 0.033510916 |
| <b>2</b>   | 14-3-3-epsilon-M-C   | YWHAE    | -0.043 | -0.06 | 0    | 0.397  | 0.3745 | 0.4   | 0.42  | 2.76339E-05 | 0.000354435 |
| <b>224</b> | PRAS40-M-C           | AKT1S1   | -0.092 | -0.05 | -0   | 0.4171 | 0.376  | 0.357 | 0.43  | 0.000101185 | 0.000621868 |
| <b>118</b> | GAPDH-M-C            | GAPDH    | -0.218 | 0.041 | 0.21 | 0.5212 | 0.3813 | 0.417 | 0.43  | 0.029888243 | 0.046405429 |
| <b>119</b> | GATA3-M-V            | GATA3    | 0.055  | -0.12 | 0.08 | 0.3824 | 0.4433 | 0.458 | 0.43  | 0.003273126 | 0.008469931 |
| <b>97</b>  | EGFR-R-V             | EGFR     | -0.109 | -0.06 | -0   | 0.3233 | 0.3888 | 0.41  | 0.44  | 0.000208379 | 0.001017063 |
| <b>154</b> | LC3A-B-R-C           | LC3AB    | 0.051  | 0.016 | 0.09 | 0.4748 | 0.5067 | 0.506 | 0.44  | 4.50867E-05 | 0.000443353 |
| <b>19</b>  | Annexin-VII-M-V      | ANXA7    | -0.081 | 0.018 | -0.1 | 0.4748 | 0.3435 | 0.341 | 0.44  | 0.00142342  | 0.004663414 |
| <b>88</b>  | DJ1-R-V              | PARK7    | 0.007  | -0.1  | -0.3 | 0.4644 | 0.2069 | 0.247 | 0.45  | 0.026524442 | 0.0416208   |
| <b>121</b> | Glutamate-D1-2-R-C   | GLUD     | -0.073 | -0.08 | 0.07 | 0.4077 | 0.4139 | 0.459 | 0.45  | 0.000904461 | 0.00317638  |
| <b>90</b>  | DM-K9-Histone-H3-R-C | H3K9ME2  | -0.152 | -0.11 | 0.1  | 0.4423 | 0.4422 | 0.432 | 0.49  | 0.002927124 | 0.007922032 |
| <b>129</b> | HER2-M-V             | ERBB2    | -0.197 | -0    | 0.12 | 0.4487 | 0.5202 | 0.461 | 0.5   | 0.005859189 | 0.012135655 |
| <b>113</b> | FoxO3a-R-C           | FOX3     | -0.349 | 0.019 | 0.25 | 0.4653 | 0.4941 | 0.514 | 0.52  | 0.042621791 | 0.063824509 |
| <b>167</b> | Mitochondria-M-V     | MTCO2    | -0.076 | -0.14 | -0.1 | 0.509  | 0.3982 | 0.304 | 0.52  | 0.001139785 | 0.003909727 |
| <b>3</b>   | 14-3-3-zeta-R-V      | YWHAZ    | 0.091  | -0.03 | -0.2 | 0.5312 | 0.5166 | 0.408 | 0.55  | 0.006170917 | 0.012468633 |

|            |                        |       |        |       |      |        |        |       |             |             |             |
|------------|------------------------|-------|--------|-------|------|--------|--------|-------|-------------|-------------|-------------|
| <b>86</b>  | Cyclophilin-F-M-V      | PPIF  | -0.22  | -0.26 | -0.5 | 0.5964 | 0.0604 | 0.07  | <b>0.57</b> | 0.044620057 | 0.066479378 |
| <b>116</b> | G6PD-M-V               | G6PD  | -0.129 | -0.2  | -0.1 | 0.4748 | 0.4576 | 0.454 | <b>0.59</b> | 0.00014114  | 0.000743503 |
| <b>222</b> | Porin-M-V              | VDAC1 | -0.047 | 0.05  | -0   | 0.6727 | 0.5872 | 0.597 | <b>0.62</b> | 9.23572E-05 | 0.000592291 |
| <b>77</b>  | Complex-II-Subunit-M-V | SDHB  | -0.046 | -0.24 | -0.4 | 0.5483 | 0.4774 | 0.303 | <b>0.67</b> | 0.006020198 | 0.012247988 |
| <b>267</b> | Stathmin-1-R-V         | STMN1 | -0.147 | -0.05 | -0.2 | 0.7857 | 0.4255 | 0.44  | <b>0.68</b> | 0.005566114 | 0.011728598 |
| <b>259</b> | SOD2-R-V               | SOD2  | -0.132 | 0.011 | -0   | 0.7301 | 0.6306 | 0.558 | <b>0.69</b> | 0.000444712 | 0.001901304 |
| <b>103</b> | EMA-M-C                | EMA   | -0.21  | -0.06 | -0.6 | 0.5947 | 0.535  | 0.154 | <b>0.72</b> | 0.028326146 | 0.044212768 |
| <b>31</b>  | b-Actin-R-C            | ACTB  | -0.065 | -0.2  | -0   | 0.6573 | 0.6722 | 0.638 | <b>0.75</b> | 0.000216986 | 0.001032432 |
| <b>218</b> | PKM2-R-C               | PKM2  | -0.063 | -0.19 | -0.3 | 0.589  | 0.5872 | 0.521 | <b>0.76</b> | 0.000749667 | 0.002835279 |
| <b>249</b> | SDHA-R-V               | SDHA  | -0.255 | -0.24 | -0.3 | 0.5855 | 0.551  | 0.631 | <b>0.84</b> | 3.7971E-06  | 9.90684E-05 |
| <b>271</b> | TFAM-R-V               | TFAM  | -0.247 | -0.19 | -0.4 | 0.702  | 0.6408 | 0.633 | <b>0.93</b> | 0.000112017 | 0.000633037 |
| <b>128</b> | H2AX_pS140-M-C         | H2AFX | -0.492 | -0.69 | -0.7 | 0.8299 | 0.7184 | 0.828 | <b>1.41</b> | 4.03766E-05 | 0.000410727 |
| <b>57</b>  | Caspase-3-R-C          | CASP3 | -0.321 | -0.22 | -0.3 | 1.32   | 1.3528 | 1.348 | <b>1.63</b> | 9.721E-07   | 4.77949E-05 |
| <b>58</b>  | Caspase-7-cleaved-R-C  | CASP7 | -0.461 | -0.52 | -0.5 | 1.714  | 1.6829 | 1.687 | <b>2.18</b> | 7.26E-08    | 0.000021417 |
